# Supplementary material for: Photogalvanics of copper and brass working electrodes in the NaOH-Allura Red-d-galactose-DDAC electrolyte for solar power generation
Source: PubMed Central journal article supplement — RSC Adv. 2024 May 3;14(21):14648–64. doi: 10.1039/d4ra01091d (PMC11066974; doi:10.1039/d4ra01091d), 2024-05-03
Supplement: RA-014-D4RA01091D-s001.pdf [file RA-014-D4RA01091D-s001.pdf]

### Supplementary Information for

#### **Photogalvanics of the Copper and Brass working electrodes in the NaOH-Allura Red-D-Galactose-DDAC electrolyte for solar power generation**

Pooran Koli\*, Jyoti Saren, Department of Chemistry, Jai Narain Vyas University, Jodhpur-342033, Rajasthan, INDIA . \*[poorankoli@yahoo.com](mailto:poorankoli@yahoo.com); [saren2jyoti@gmail.com](mailto:saren2jyoti@gmail.com)

##### **1. Electrolyte composition variation for photogalvanics of Copper working electrode (0.3 cm × 0.2 cm)**

The electrical parameters of the Allura Red-D-Galactose-DDAC-Copper photogalvanic system are observed by taking 35 ml of the total solution in each four cells. The concentration of each chemical is different in each of the four cells. The 1<sup>st</sup> cell has 0.05 ml of M/500 Allura Red (dye) with resultant concentration  $0.28 \times 10^{-5}$  M, 0.05 ml of M/100 D-Galactose (reductant) with resultant concentration  $0.14 \times 10^{-4}$  M, 0.05 ml of M/10 Didecyl Dimethyl Ammonium Chloride (surfactant) with resultant concentration  $0.14 \times 10^{-3}$  M and 1N NaOH of resultant pH 13.66. The 2<sup>nd</sup> cell has 0.1 ml of M/500 Allura Red (dye) with resultant concentration  $0.57 \times 10^{-5}$  M, 0.1 ml of M/100 D-Galactose (reductant) with resultant concentration  $0.28 \times 10^{-4}$  M, 0.1 ml of M/10 Didecyl Dimethyl Ammonium Chloride (surfactant) with resultant concentration  $0.28 \times 10^{-3}$  M and 1N NaOH of resultant pH 13.66. The 3<sup>rd</sup> cell has 0.5 ml of M/500 Allura Red (dye) with resultant concentration  $2.85 \times 10^{-5}$  M, 0.5 ml of M/100 D-Galactose (reductant) with resultant concentration  $1.42 \times 10^{-4}$  M, 0.5 ml of M/10 Didecyl Dimethyl Ammonium Chloride (surfactant) with resultant concentration  $1.42 \times 10^{-3}$  M and 1N NaOH of resultant pH 13.66. The 4<sup>th</sup> cell has 1.5 ml of M/500 Allura Red (dye) with resultant concentration  $8.5 \times 10^{-5}$  M, 1.5 ml of M/100 D-Galactose (reductant) with resultant concentration  $4.28 \times 10^{-4}$  M, 1.5 ml of M/10 Didecyl Dimethyl Ammonium Chloride (surfactant) with resultant concentration  $4.28 \times 10^{-3}$  M and 1N NaOH of resultant pH 13.66.

---

\*E-mail: [poorankoli@yahoo.com](mailto:poorankoli@yahoo.com); [saren2jyoti@gmail.com](mailto:saren2jyoti@gmail.com);

## **2. Study of potential variation with time during illumination of the NaOH-Allura Red-D-Galactose-DDAC-Brass (0.3 cm × 0.2 cm) photogalvanic system**

In the Allura Red-D-Galactose-DDAC-Brass photogalvanic system, the H-cell is filled with the known amount of the electrolyte solution (total volume 35 ml, 0.5 ml of M/500 dye, 0.5 ml of M/100 reductant, 0.5 ml of M/10 surfactant, 16 ml of 1N NaOH, and 17.5 ml of distilled water).

## **3. Electrolyte composition variation for photogalvanics of Brass working electrode (0.3 cm × 0.2 cm)**

The electrical parameters of the Allura Red-D-Galactose-DDAC-Brass photogalvanic system are observed by taking 35 ml of the total solution in each five cells. The concentration of each chemical is different in each of the five cells. The 1<sup>st</sup> cell has 0.05 ml of M/500 Allura Red (dye) with resultant concentration  $0.28 \times 10^{-5}$  M, 0.05 ml of M/100D-Galactose (reductant) with resultant concentration  $0.14 \times 10^{-4}$  M, 0.05 ml of M/10 Didecyl Dimethyl Ammonium Chloride (surfactant) with resultant concentration  $0.14 \times 10^{-3}$  M and 16 ml of 1N NaOH with resultant pH 13.66. The 2<sup>nd</sup> cell has 0.1 ml of M/500 Allura Red (dye) with resultant concentration  $0.57 \times 10^{-5}$  M, 0.1 ml of M/100 D-Galactose (reductant) with resultant concentration  $0.28 \times 10^{-4}$  M, 0.1 ml of M/10 Didecyl Dimethyl Ammonium Chloride (surfactant) with resultant concentration  $0.28 \times 10^{-3}$  M, and 16ml of 1N NaOH with resultant pH 13.66. The 3<sup>rd</sup> cell has 0.5 ml of M/500 Allura Red (dye) with resultant concentration  $2.85 \times 10^{-5}$  M, 0.5 ml of M/100 D-Galactose (reductant) with resultant concentration  $1.42 \times 10^{-4}$  M, 0.5 ml of M/10 Didecyl Dimethyl Ammonium Chloride (surfactant) with resultant concentration  $1.42 \times 10^{-3}$  M, and 16 ml of 1N NaOH of resultant pH 13.66. The 4<sup>th</sup> cell has 1.5 ml of M/500 Allura Red (dye) with resultant concentration  $8.5 \times 10^{-5}$  M, 1.5 ml of M/100 D-Galactose (reductant) with resultant concentration  $4.28 \times 10^{-4}$  M, 1.5 ml of M/10 Didecyl Dimethyl Ammonium Chloride (surfactant) with resultant concentration  $4.28 \times 10^{-3}$  M, and 16 ml of 1N NaOH with resultant pH 13.66. It has been observed in this study that the electrical power output for the 2<sup>nd</sup> cell is highest. It has been observed in this study that the electrical power output for the 2<sup>nd</sup> cell is highest. In the 2<sup>nd</sup> cell the dye, reductant, surfactant and NaOH show highest cell performance at the optimal concentration of Dye  $0.28 \times 10^{-5}$  M, reductant  $0.14 \times 10^{-4}$  M, surfactant  $0.14 \times 10^{-3}$  M, NaOH pH 13.66.

## **4. Comparison of the photogalvanics of Copper, Brass, and platinum working electrodes**

Each platinum based cell has 0.5 ml of M/100 D-Galactose (reductant) with resultant concentration  $1.42 \times 10^{-4}$  M, 0.5 ml of M/10 Didecyl Dimethyl Ammonium Chloride (surfactant) with resultant concentration  $1.42 \times 10^{-3}$  M, 16ml of 1N NaOH having resultant pH 13.66, 0.5 ml of M/500 Allura Red-D dye with resultant concentration  $2.85 \times 10^{-5}$  M, light intensity = 7.299 mWcm<sup>2</sup>, diffusion length (DL) = 4.5 cm, pH = 13.66, and graphite counter electrode (cylindrical shape, length 4.1 cm  $\times$  diameter 0.3 cm). The experimental conditions for the platinum-based cells are same as for the copper and brass based cells (see sub-sections **4.1.1** and **4.2.1** for copper and brass electrodes-based cells).
